# Supplementary material for: Molecular Detection of Reticuloendotheliosis Virus 5′ Long Terminal Repeat Integration in the Genome of Avipoxvirus Field Strains from Different Avian Species in Egypt
Source: PubMed Central journal article supplement (PMC7563266; doi:10.3390/biology9090257), 2020-08-31
Supplement: biology-09-00257-s001.pdf [file biology-09-00257-s001.pdf]

## Supporting information

# **Molecular Detection of Reticuloendotheliosis virus 5' Long Terminal Repeat Integration in the Genome of Avipoxvirus Field Strains from Different Avian Species in Egypt**

**Samah M. Mosad <sup>1</sup>, Mohamed El-Tholoth <sup>1,2</sup>, Ali A. El-Kenawy <sup>1</sup>, Lina Jamil M. Abdel-Hafez <sup>3</sup>, Fatma A. El-Gohary <sup>4</sup>, Hanem El-Sharkawy <sup>5</sup>, Mona Mohieldin Elsayed <sup>4</sup>, Ayman A. Saleh <sup>6</sup> and Ehab Kotb Elmahallawy <sup>7,8\*</sup>**

1 Department of Virology, Faculty of Veterinary Medicine, Mansoura University, 35516-Mansoura, Egypt. 1; dr.sama786@yahoo.com; (S.M.M); tholothvirol@mans.edu.eg (M.E); elkenawya@mansu.edu.eg (A.A.E)

2 Veterinary Science Division, Al Ain Men's Campus, Higher Colleges of Technology, 17155-Al Ain, Abu Dhabi, United Arab Emirates. 2; meltholoth@hct.ac.ae

3 Department of Microbiology and Immunology, Faculty of Pharmacy, October 6 University, October 6 City 12566, Giza, Egypt; Lina.jamil@ymail.com

4 Department of Hygiene and Zoonoses, Faculty of Veterinary Medicine, Mansoura University, Mansoura 35516, Egypt; dr.fatmagohary@gmail.com(F.A.E); dr.monamohy@yahoo.com (M.M)

5 Department of Poultry and Rabbit Diseases, Faculty of Veterinary Medicine, Kafrelsheikh University, Kafrelsheikh 33511, Egypt; hanem\_amin@yahoo.com

6 Department of Animal Wealth Development, Genetics and Genetic Engineering, Faculty of Veterinary Medicine, Zagazig University, Zagazig 44519, Egypt; lateefsaleh@yahoo.com

7 Department of Biomedical Sciences, University of Leon, León 24071, Spain;

8 Department of Zoonotic diseases, Faculty of Veterinary Medicine, Sohag University, Sohag 82524, Egypt;

\* Correspondence: Dr Ehab Kotb Elmahallawy, PhD, [eehaa@unileon.es](mailto:eehaa@unileon.es)

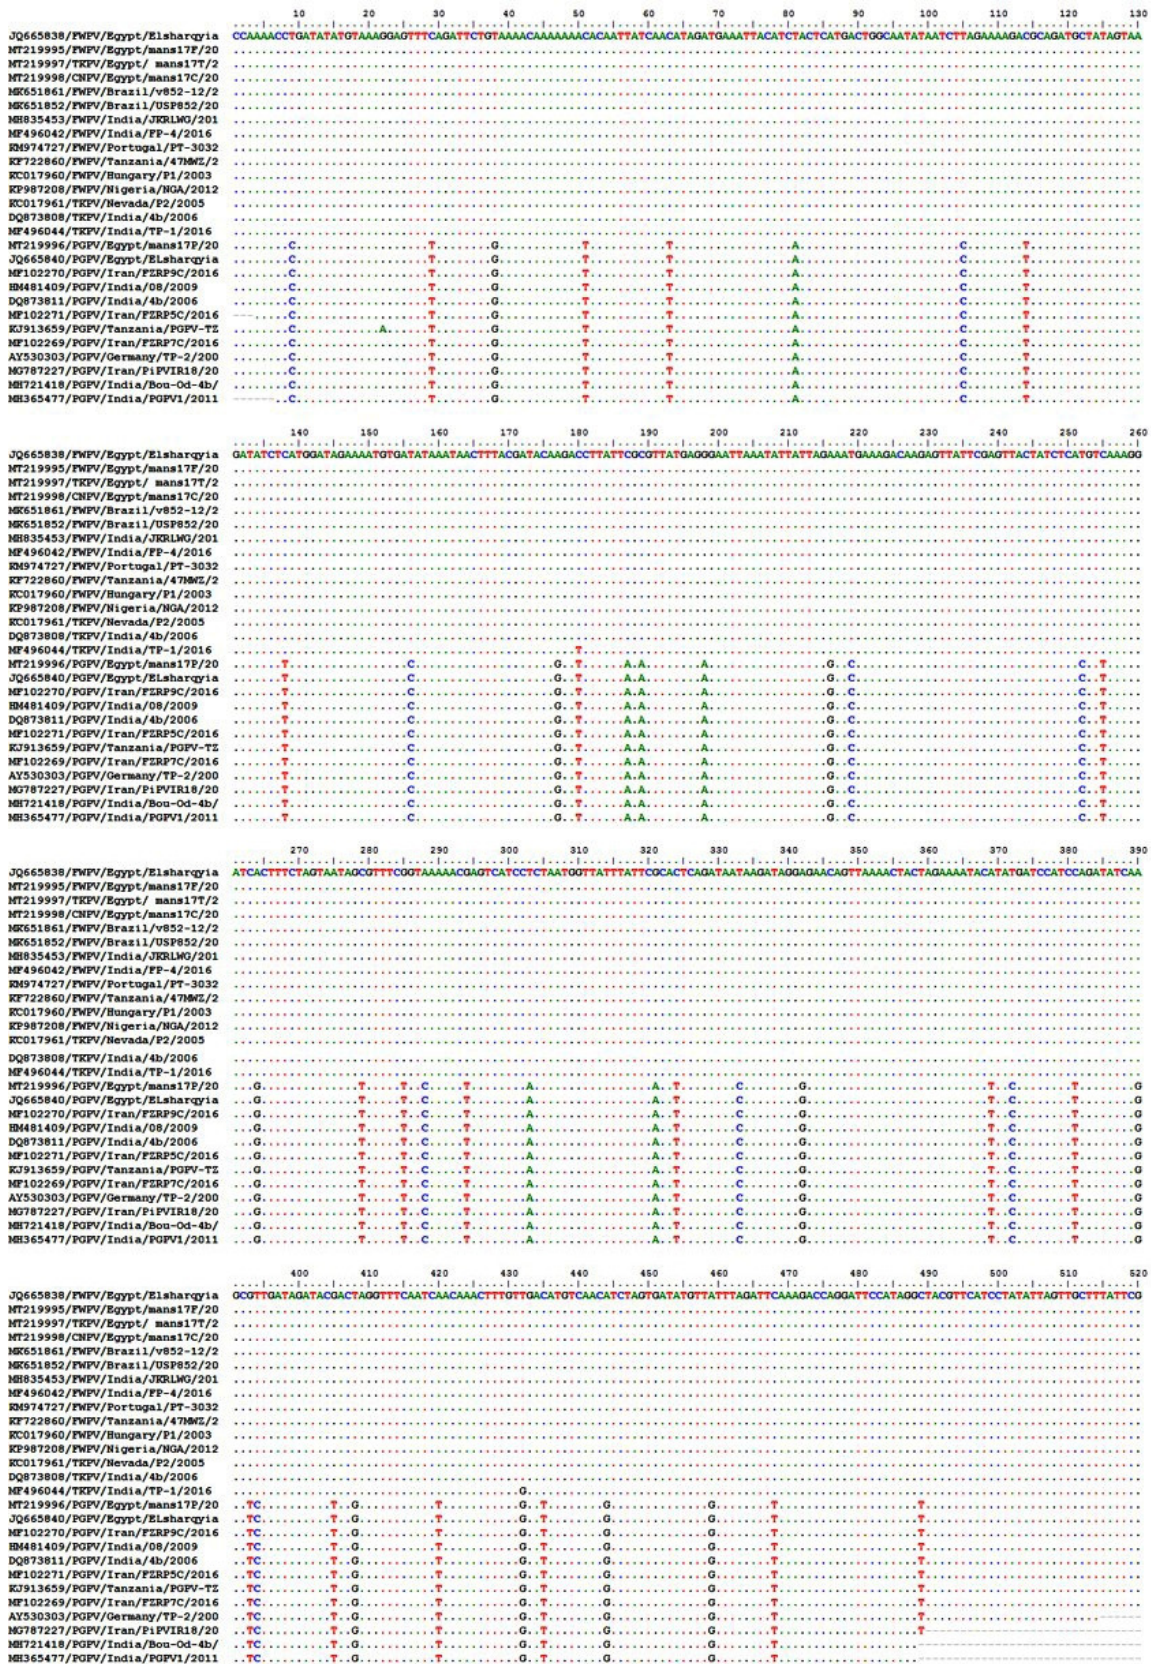

Supplementary Figure S1. The BioEdit multiple alignments of amplified *P4b* gene nucleotide sequences of our APVs isolates compared to other reference APVs sequences retrieved from GenBank. PGPV strains have 44 nucleotide substitutions in comparison with FWPV and TKPV strains.

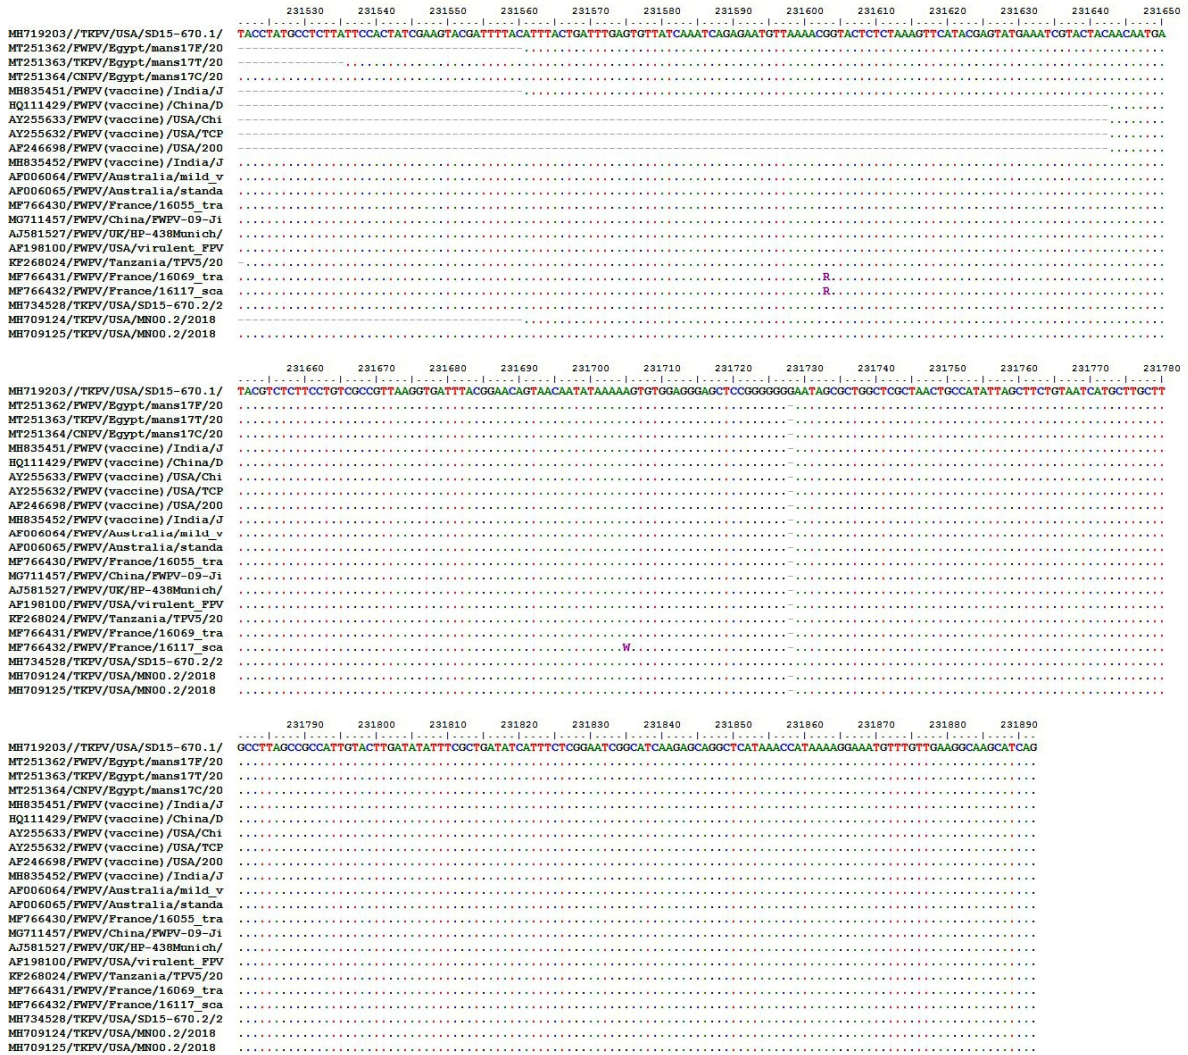

**Supplementary Figure S2.** The BioEdit multiple alignments of amplified REV-5'LTR nucleotide sequences detected in our APVs isolates in comparison to other reference REV-5'LTR sequences available in GenBank. All aligned sequences are identical to each other without any nucleotide substitution.
